# Supplementary material for: A novel peptide targeting gastrin releasing peptide receptor for pancreatic neoplasm detection
Source: Royal Society of Chemistry journal article supplement (doi:10.1039/d0bm00162g), 2020-01-01
Supplement: d0bm00162g1.pdf [file d0bm00162g1.pdf]

## Supporting Information

### A Novel Peptide Targeting Gastrin Releasing Peptide Receptor for Pancreatic Neoplasms

#### Detection

*Yuanbiao Tu, Ji Tao, Fang Wang, Peifei Liu, Zhihao Han, Zhaolun Li, Yi Ma, and Yueqing Gu\**

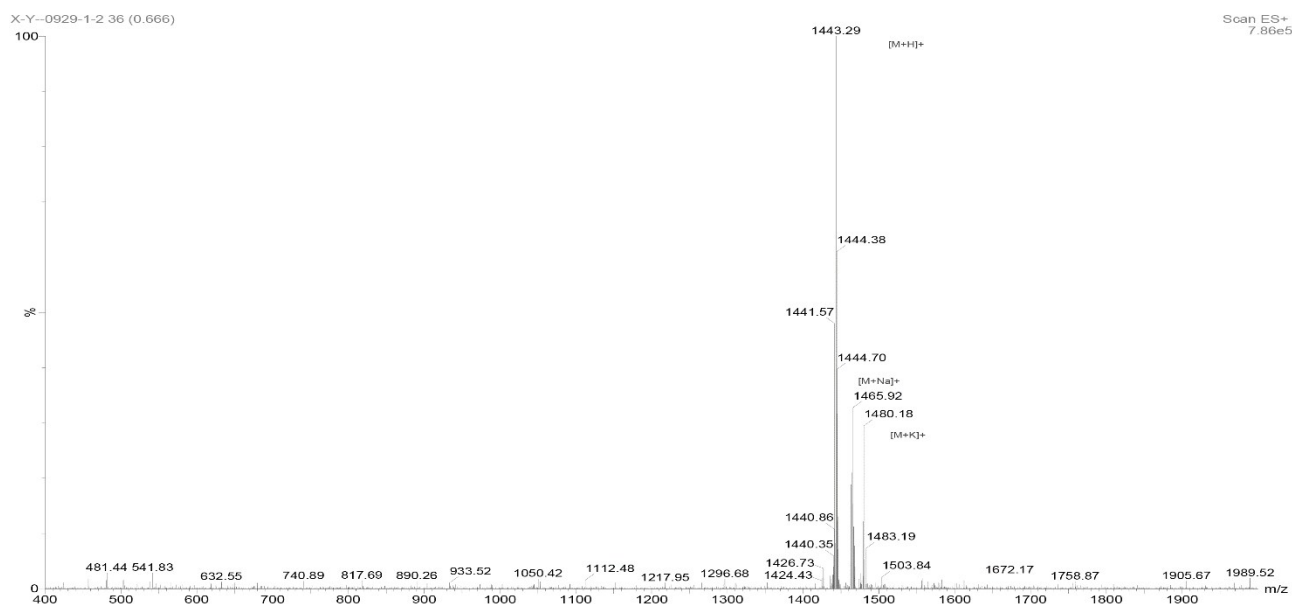

**Figure S1-1.** MS spectrum of BBN<sub>7-14</sub>-FITC (MW:1442.66)

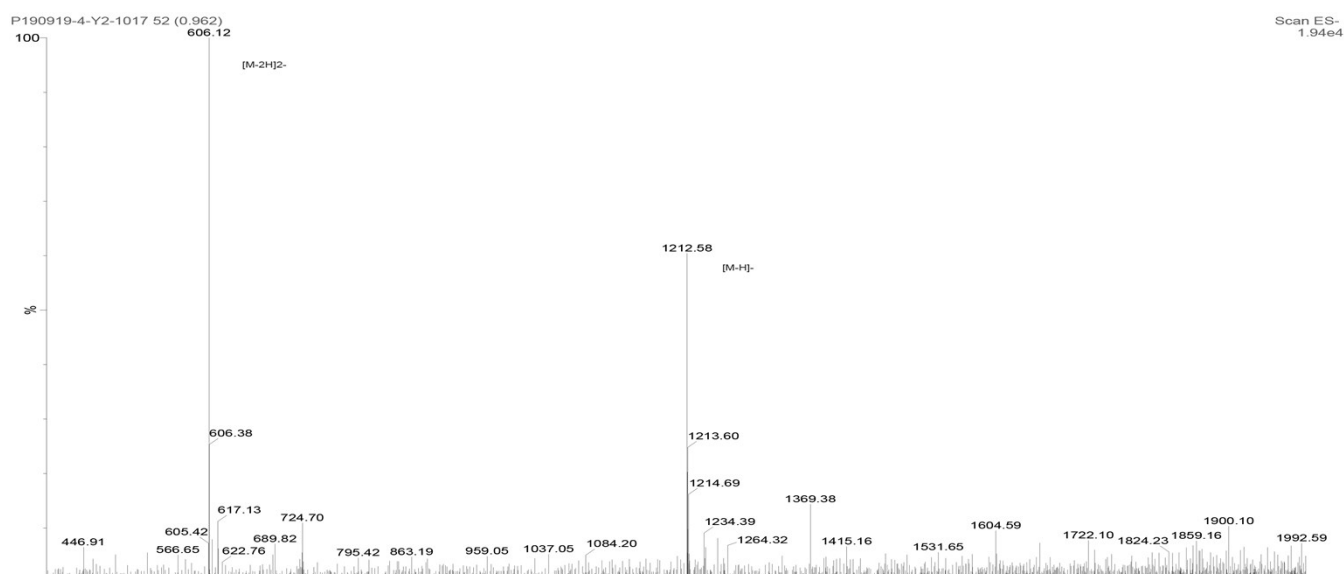

**Figure S1-2.** MS spectrum of GB-6-FITC (MW:1214.3)

**MPA:**  $^1\text{H NMR}$  (400 MHz,  $\text{D}_2\text{O}$ )  $\delta$  8.76 (d,  $J = 13.7$  Hz, 2H), 7.79 (s, 2H), 7.73 (d,  $J = 8.3$  Hz, 2H), 7.27 (d,  $J = 8.4$  Hz, 2H), 6.27 (d,  $J = 18.6$  Hz, 2H), 4.20 (dd,  $J = 9.8, 4.8$  Hz, 4H), 2.96 (t,  $J = 7.0$  Hz, 5H), 2.82 (t,  $J = 7.1$  Hz, 2H), 2.60 – 2.53 (m, H), 2.49 (t,  $J = 7.0$  Hz, 2H), 2.36 (t,  $J = 7.0$  Hz, 2H), 2.24-2.09 (m, 4H), 1.86-1.63 (m, 12H).

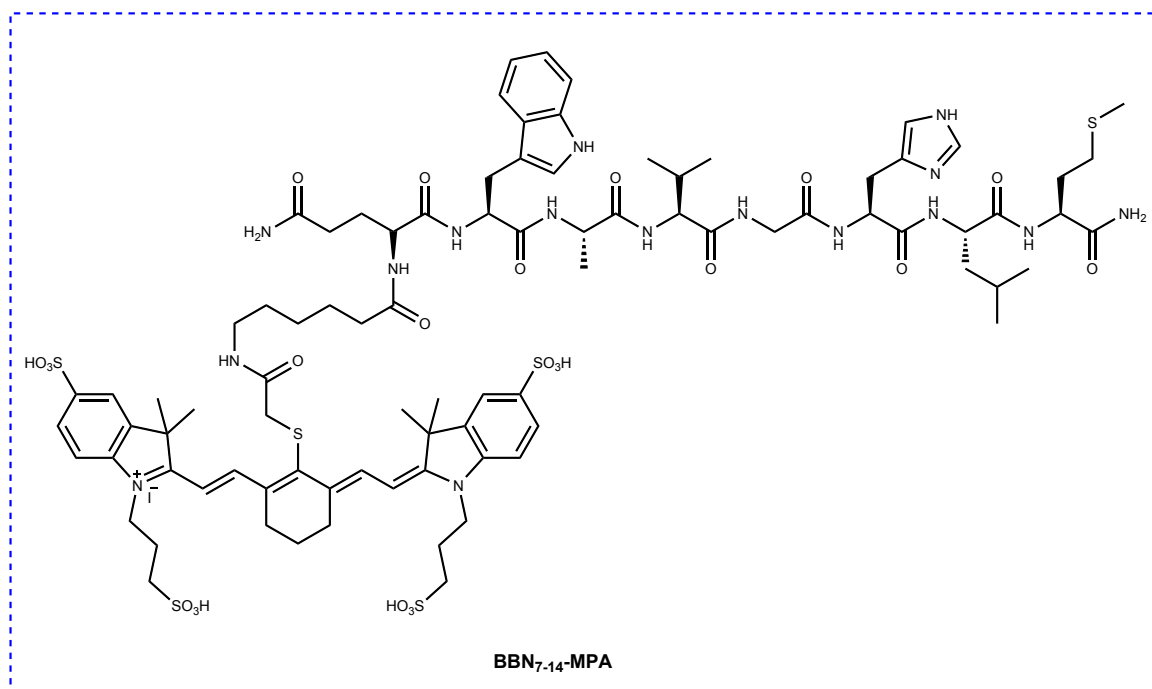

**Figure S2-1.** The chemical structures of BBN<sub>7-14</sub>-MPA

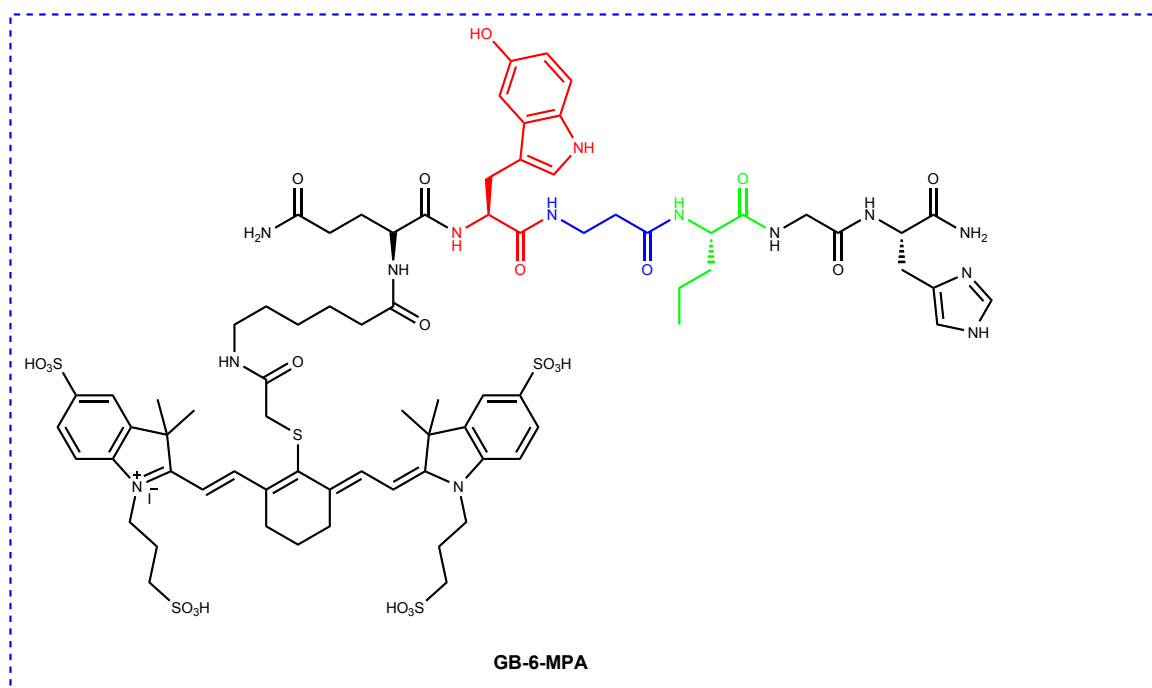

**Figure S2-2.** The chemical structures of GB-6-MPA

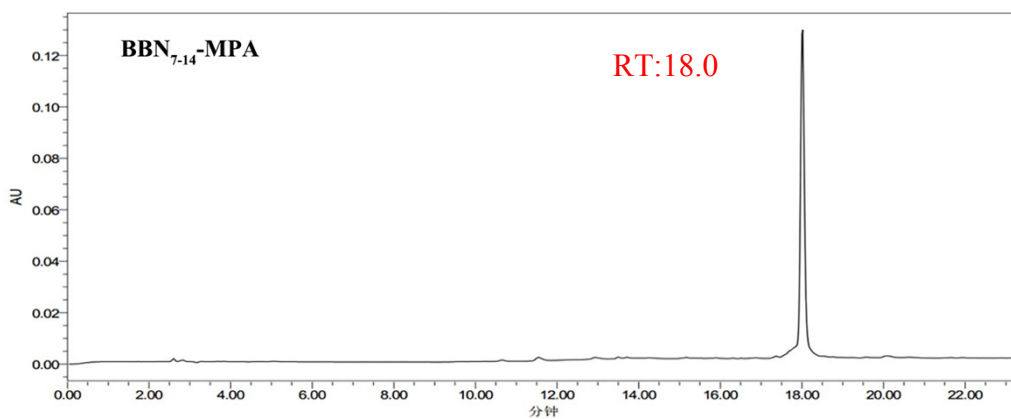

Figure S2-3 Typical radio-HPLC chromatogram of BBN<sub>7-14</sub>-MPA. (RT: retention time)

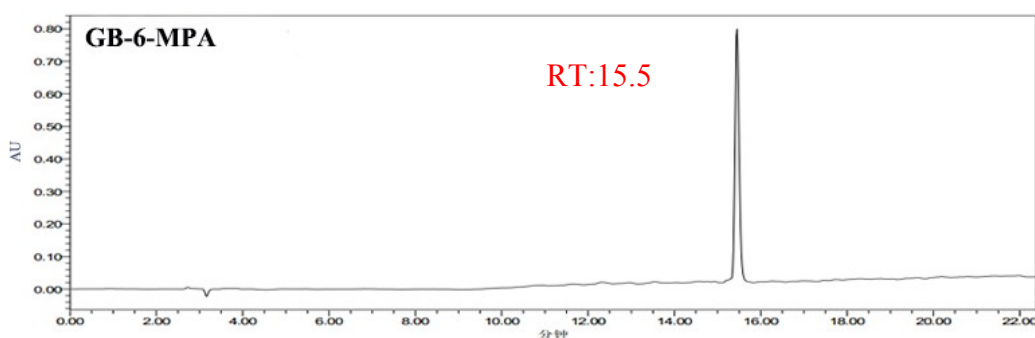

Figure S2-4 Typical radio-HPLC chromatogram of GB-6-MPA. (RT: retention time)

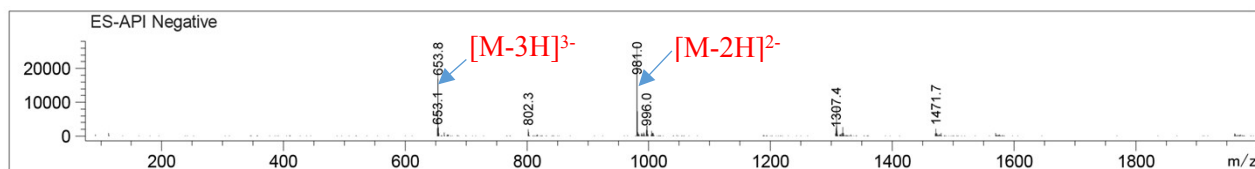

Figure S2-5. MS spectrum of BBN<sub>7-14</sub>-MPA (MW:1965.42)

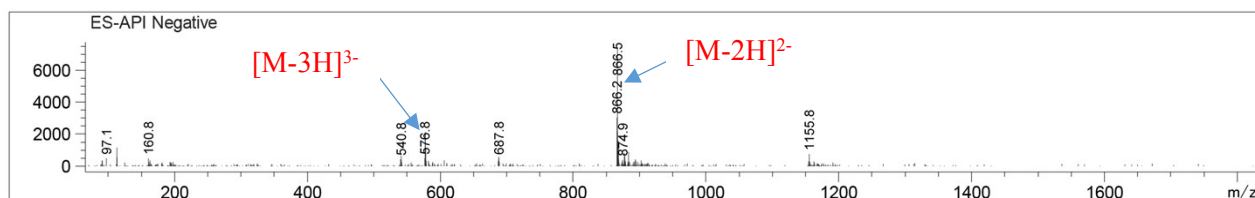

Figure S2-6. MS spectrum of GB-6-MPA (MW:1736.06)

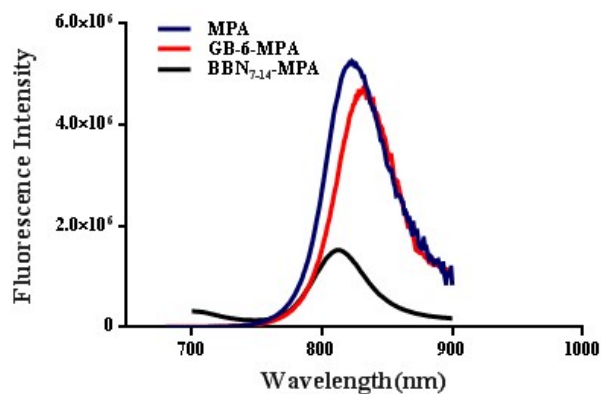

**Figure S2-7.** fluorescence spectra of free MPA, GB-6-MPA and BBN<sub>7-14</sub>-MPA, respectively.

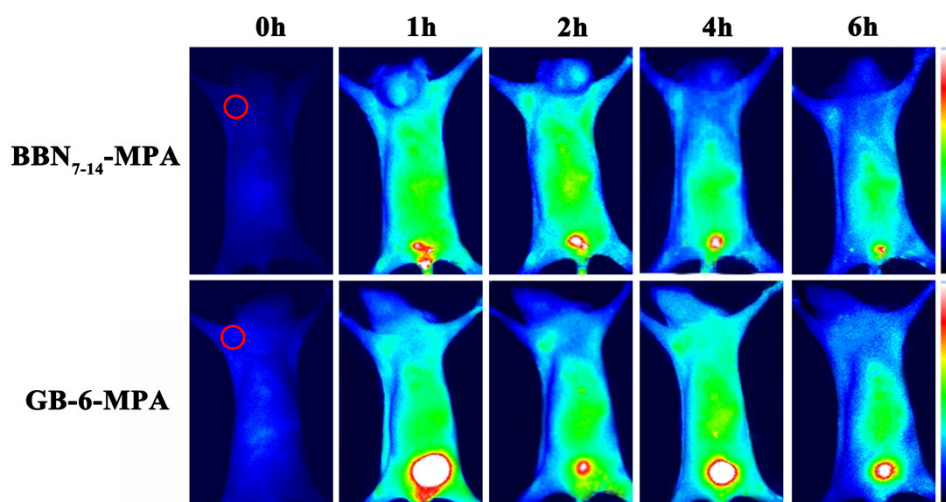

**Figure S3** *in vivo* imaging of BBN<sub>7-14</sub>-MPA and GB-6-MPA in mice bearing HeLa tumors at different times. (The position of the tumor was indicated by a red dashed-dotted circle.)

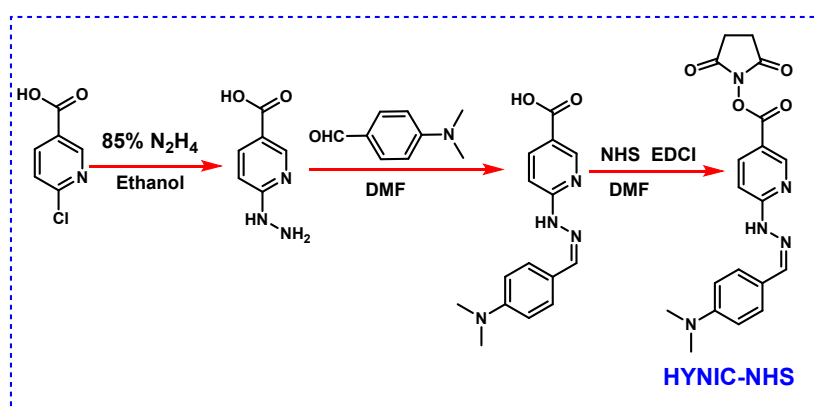

**Figure S4-1.** Structure and synthetic route of HYNIC-NHS

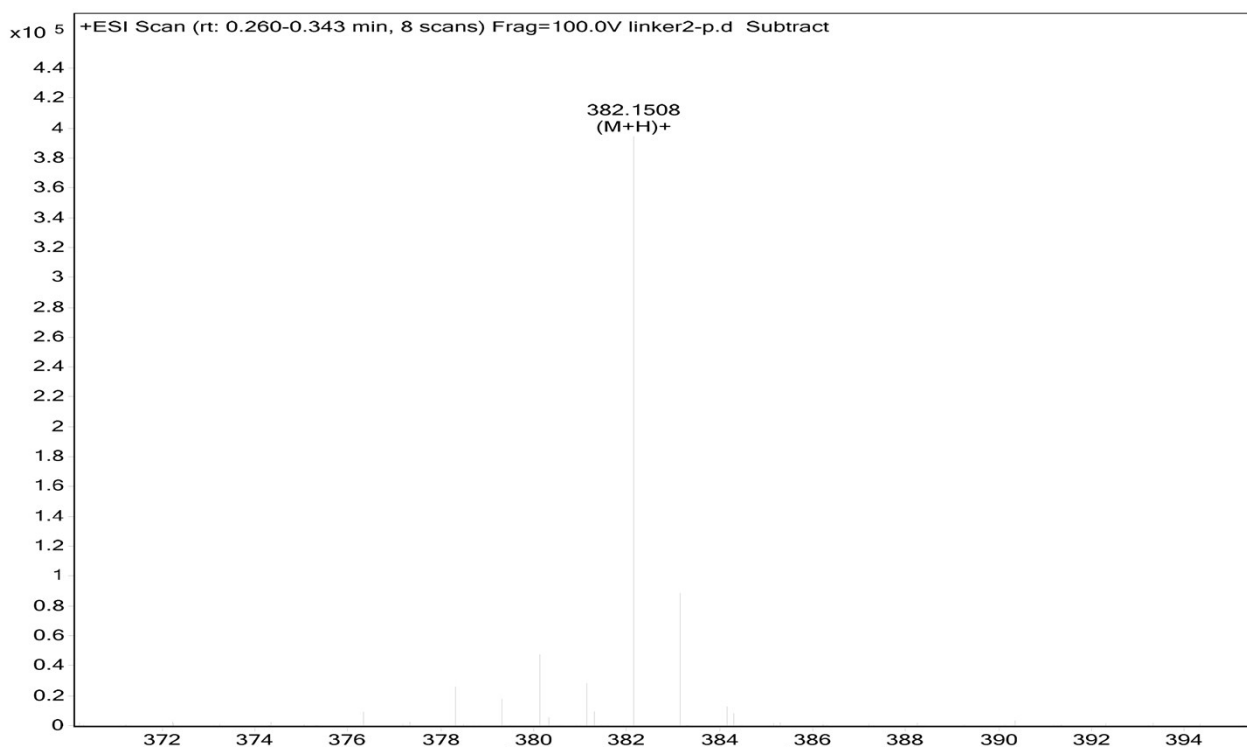

**Figure S4-2.** MS spectrum of HYNIC-NHS (MW:381.39)

**HYNIC-NHS:** <sup>1</sup>H NMR (400 MHz, DMSO-d) δ 8.60 (s, 1H), 8.08 (d, J = 7.5 Hz, 1H), 7.99 (s, 1H), 7.51 (d, J = 7.3 Hz, 2H), 7.40 (d, J = 7.5 Hz, 1H), 6.71 (d, J = 7.6 Hz, 2H), 3.01 (s, 6H), 2.78 (s, 4H).

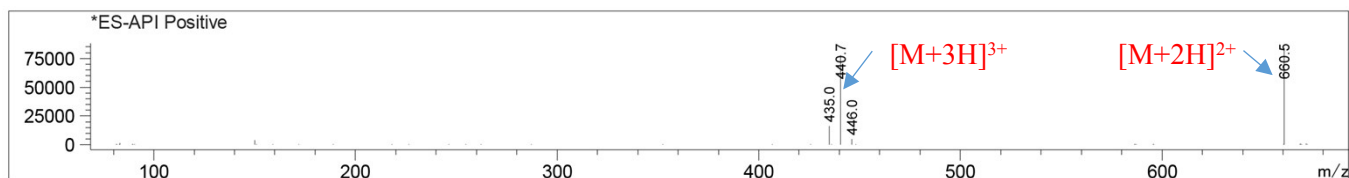

**Figure S4-3.** MS spectrum of HYNIC-BBN<sub>7-14</sub> (MW:1319.66)

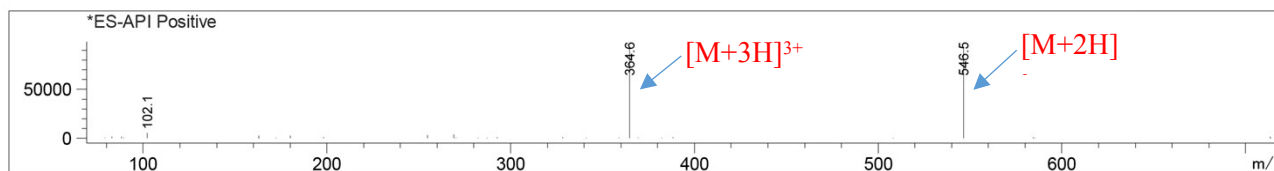

**Figure S4-4.** MS spectrum of HYNIC-GB-6 (MW:1091.23)

## Radiochemistry

HYNIC-BBN<sub>7-14</sub> and HYNIC-GB-6 were prepared by direct conjugation of Aca-BBN<sub>7-14</sub> or Aca-GB-6 with HYNIC-NHS (Figure S3-1), respectively. The products were confirmed by C18 analytical HPLC (purity >98%). The molecule weight of HYNIC- BBN7-14 was corroborated by mass spectrometry ( $[M+2H]^{2+}=660.5$  and  $[M+3H]^{3+}=440.7$ ) and matches with calculated value (1319.66) (Figure S3-3). The mass measured molecule weight of HYNIC-GB-6 ( $[M+2H]^{2+}=613.5$  and  $[M+3H]^{3+}= 409.4$ ) and was consistent with the expected molecule weight (1225.39). HYNIC-BBN<sub>7-14</sub> and HYNIC-GB-6 were radiolabeled with Na<sup>99m</sup>TcO<sub>4</sub> through a reported method, using TPPTS and tricine as coligands to obtain highly stable complexes with a yield of >96% and specific activity of >25 GBq/μmol. Subsequent, the tracers were purified via a Sep-Pak C-18 column and improved the radiochemical purity of the tracers to >99%. The Radio-HPLC chromatography of the purified tracers are shown in Figure S3-5. The well-prepared probe was used for further experiments, without further purification.

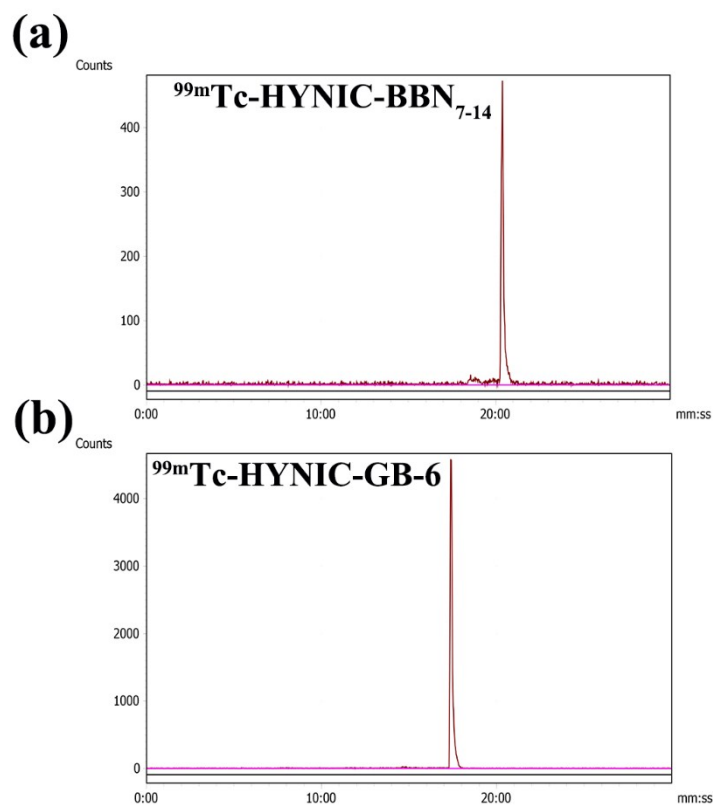

**Figure S4-5.** Typical radio-HPLC chromatogram of <sup>99m</sup>Tc-radiolabeled compounds.

**Cellular viability assays in vitro :** The standard MTT assays were carried out to evaluate the potential cytotoxicity in *vitro*. Briefly, CFPAC-1 and HeLa cells (Keygen Biotech, Nanjing, China) were seeded at a density of  $1 \times 10^4$  cells per well in 96-well plates and grown for 24 h at 37 °C in 5% CO<sub>2</sub>. Then, the cells were incubated with GB-6-MPA (0.5, 2, 4, 16, 32, 128 μM) for 24 h at 37 °C. The stock solution of MTT (20 μL, 5 mg/mL) was added into each well and incubated for 4 h at 37 °C. Next, the medium were removed and followed by addition of 150 μL DMSO to each well to dissolve insoluble blue-violet crystals. The plate was shaken slowly on a horizontal shaker for 10 minutes to promote dissolution. The optical density (OD) value was calculated with a microplate reader (BioTek, USA) at 490 nm. The cell viability (%) was calculated as a percentage of the control culture value by  $(OD_{\text{sample}} - OD_{\text{blank}} / OD_{\text{control}} - OD_{\text{blank}}) \times 100\%$  using GraphPad Prism 6.0 software.

**In vivo toxicity:** General toxicity of GB-6-MPA was evaluated in an acute single-dose toxicity study in BALB/c mice. The test group received injections of 100 mg/kg body weight scaled for body surface area and were observed up to 1 week afterwards and the control group were treated with PBS. After 7 d, mice were sacrificed and heart, liver, spleen, lung, and kidney tissue sections were obtained to observe the pathological changes .

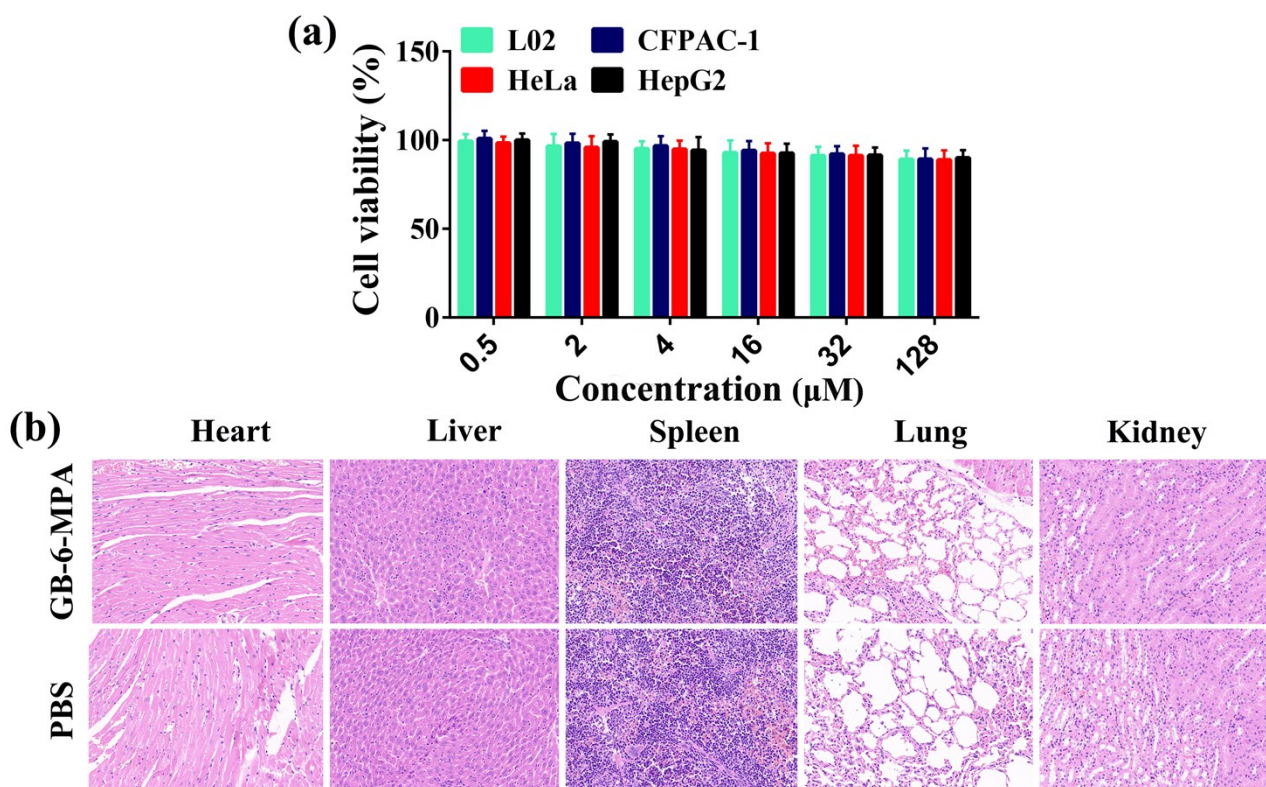

**Figure S5** Cell viability assay *in vitro* and toxicity assay *in vivo* of GB-6-MPA. (A) The cell viability of GB-6-MPA in L02, CFPAC-1, HeLa and HepG2 were examined by MTT assay. (B) Acute toxicity was tested in mice and H&E staining was used to stain the excised organs observed for H&E analysis. Cell viability assay was carried out in order to investigate the *in vitro* toxicity after treatment of GB-6-MPA for 4 h with different concentrations on L02, CFPAC-1, HeLa and HepG2 cell lines. No significant toxic effect to the four cell lines were observed upon treatment with GB-6-MPA at any concentration for 4 h, with a percentage of viability of over 80.0% (Figure S4A). Further, acute toxicity was tested in *in vivo* model by tail vein injection. H&E staining was used to stain the excised organs including heart, liver, spleen, lung and kidney observed for H&E analysis after the acute toxicity experiment (Figure S4B). We evaluated the histological examination results and found no drug toxicity, infection, or organ damage in GB-6-MPA groups as compared with PBS control group.
